# Supplementary material
Source: HighWire-hosted journal article supplement (https://bmjopen.bmj.com/content/13/12/e075190)
Supplement: inline-supplementary-material-1 [file inline-supplementary-material-1.pdf]

**SUPPLEMENTARY FILE 1**

## Questionnaire

# Healthcare professionals' experiences with COVID-19 patients in intensive care units in Norway

---

Demographics

---

1. What is your age?

2. Gender

- ☐ Female
- ☐ Male

3. What is your marital status?

- ☐ Married / partner
- ☐ Unmarried
- ☐ Widow / widower
- ☐ Other

4. What is your pre-Covid profession?

- ☐ Registered nurse
- ☐ Intensive care nurse
- ☐ Anaesthetic nurse
- ☐ Operating theatre nurse
- ☐ Clinical teacher
- ☐ Paediatric nurse
- ☐ Anaesthesiologist
- ☐ Intensive care physician
- ☐ Cardiologist
- ☐ MD, Permanent resident

- ☐ MD Physician under specialization (LIS)
- ☐ MD Physician, external supervisory tasks
- ☐ Psychiatrist
- ☐ Manager/leader

5. If you are a doctor, how many years have you practiced medicine since earning your degree? If you are a nurse, how many years have you practiced nursing since you trained as a nurse?

6. Have you had any previous experience working in an intensive care unit?

- ☐ Yes
- ☐ No

7. Have you previously had symptoms of anxiety?

- ☐ Yes
- ☐ No

8. Have you previously had symptoms of depression?

- ☐ Yes
- ☐ No

9. Do you currently have any of the following risk factors for becoming infected with the coronavirus?

Heart disease, including high blood pressure; lung disease; older than 65 years of age; immune disease / immune depressants; diabetes; obesity (BMI> 30)

- ☐ Yes
- ☐ No

10. Have you considered quitting your job because of the pandemic?

- ☐ No
- ☐ Yes, sometimes

- ☐ Yes, often
- ☐ Yes, specifically planning to quit / have already resigned

11. Have you been vaccinated?

- ☐ Yes, once
- ☐ Yes, twice
- ☐ No

12. Have you been infected with COVID-19?

- ☐ Yes
- ☐ No

---

COVID-ICU related factors

---

13. Did you experience being well-prepared to begin your work in a COVID-ICU?

- ☐ Not at all
- ☐ To a small degree
- ☐ Partly
- ☐ To a high degree
- ☐ To a very high degree

14. Have you participated in practice / simulation with treatment teams in a situation that may be like working with COVID-ICU patients?

- ☐ Yes, once
- ☐ Yes, several times
- ☐ No, never

15. Have you been afraid of being infected with COVID-19 at work?

- ☐ Yes
- ☐ No

16. Have you felt lonely?

- ☐ Not at all
- ☐ To a small degree
- ☐ Partly
- ☐ To a high degree
- ☐ To a very high degree

*Do/did your employer have any kind of support measures during the COVID ICU work?*

17. No special support measures ☐ Yes ☐ No

*Did you find other measures at work supportive?*

18. Daily debrief ☐ Yes ☐ No

19. Talk to leader ☐ Yes ☐ No

20. Talk to colleague ☐ Yes ☐ No

21. Professional information ☐ Yes ☐ No

---

PCL-5

---

*Below is a list of issues that may be reactions to highly stressful events such as the COVID-19 pandemic.*

*Please indicate whether any experiences related to the COVID-19 pandemic have been stressful for you by answering each question. Have you experienced any of the following issues during the last month?*

|                                                                                               | Not at all               | A little bit             | Moderately               | Quite a bit              | Extremely                |
|-----------------------------------------------------------------------------------------------|--------------------------|--------------------------|--------------------------|--------------------------|--------------------------|
| 22. Repeated, disturbing, and unwanted memories of the stressful experiences of the pandemic? | <input type="checkbox"/> |

- |                                                                                                                                                               |                          |                          |                          |                          |                          |
|---------------------------------------------------------------------------------------------------------------------------------------------------------------|--------------------------|--------------------------|--------------------------|--------------------------|--------------------------|
| 23. Repeated, disturbing dreams of the stressful experience of the pandemic?                                                                                  | <input type="checkbox"/> |
| 24. Suddenly feeling or acting as if the stressful experience were actually happening again ( as if you were actually back there reliving it)?                | <input type="checkbox"/> |
| 25. Feeling very upset when something reminded you of the stressful experience of the pandemic?                                                               | <input type="checkbox"/> |
| 26. Having strong physical reactions when something reminded you of the stressful experience of the pandemic?                                                 | <input type="checkbox"/> |
| 27. Avoiding memories, thoughts, or feelings related to the stressful experience of the pandemic?                                                             | <input type="checkbox"/> |
| 28. Avoiding external reminders of the stressful experience of the pandemic (for example, people, places, conversations, activities, objects, or situations)? | <input type="checkbox"/> |
| 29. Trouble remembering important parts of the stressful experience of the pandemic?                                                                          | <input type="checkbox"/> |
| 30. Having strong negative beliefs about yourself, other people, or the world ( for example,                                                                  | <input type="checkbox"/> |

|                                                                                                                                           |                          |                          |                          |                          |                          |
|-------------------------------------------------------------------------------------------------------------------------------------------|--------------------------|--------------------------|--------------------------|--------------------------|--------------------------|
| having thoughts such as: I am bad, there is something seriously wrong with me, no one can be trusted, the world is completely dangerous)? |                          |                          |                          |                          |                          |
| 31. Blaming yourself or someone else for the pandemic?                                                                                    | <input type="checkbox"/> |
| 32. Having strong negative feelings such as fear, horror, anger, guilt, or shame?                                                         | <input type="checkbox"/> |
| 33. Loss of interest in activities that you used to enjoy.                                                                                | <input type="checkbox"/> |
| 34. Feeling distant or cut off from other people?                                                                                         | <input type="checkbox"/> |
| 35. Trouble experiencing positive feelings (for example, being unable to feel happiness or have loving feelings for people close to you)? | <input type="checkbox"/> |
| 36. Irritable behaviour, angry outbursts, or acting aggressively?                                                                         | <input type="checkbox"/> |
| 37. Taking too many risks or doing things that could cause you harm?                                                                      | <input type="checkbox"/> |
| 38. Being “super alert” or watchful or on guard?                                                                                          | <input type="checkbox"/> |
| 39. Feeling jumpy or easily startled?                                                                                                     | <input type="checkbox"/> |
| 40. Having difficulty concentrating?                                                                                                      | <input type="checkbox"/> |

|                                        |                          |                          |                          |                          |                          |
|----------------------------------------|--------------------------|--------------------------|--------------------------|--------------------------|--------------------------|
| 41. Trouble falling or staying asleep? | <input type="checkbox"/> |
|----------------------------------------|--------------------------|--------------------------|--------------------------|--------------------------|--------------------------|

HSCL-10

Have you experienced any of these during the last week (including today)

|                                                      | Not bothered             | A little                 | Quite a bit              | Very much bothered       |
|------------------------------------------------------|--------------------------|--------------------------|--------------------------|--------------------------|
| 42. Suddenly scared for no reason                    | <input type="checkbox"/> | <input type="checkbox"/> | <input type="checkbox"/> | <input type="checkbox"/> |
| 43. Feeling fearful                                  | <input type="checkbox"/> | <input type="checkbox"/> | <input type="checkbox"/> | <input type="checkbox"/> |
| 44. Faintness, dizziness or weakness                 | <input type="checkbox"/> | <input type="checkbox"/> | <input type="checkbox"/> | <input type="checkbox"/> |
| 45. Feeling tense or keyed up                        | <input type="checkbox"/> | <input type="checkbox"/> | <input type="checkbox"/> | <input type="checkbox"/> |
| 46. Blaming yourself for things                      | <input type="checkbox"/> | <input type="checkbox"/> | <input type="checkbox"/> | <input type="checkbox"/> |
| 47. Difficulties in falling asleep or staying asleep | <input type="checkbox"/> | <input type="checkbox"/> | <input type="checkbox"/> | <input type="checkbox"/> |
| 48. Feeling blue                                     | <input type="checkbox"/> | <input type="checkbox"/> | <input type="checkbox"/> | <input type="checkbox"/> |
| 49. Feelings of worthlessness                        | <input type="checkbox"/> | <input type="checkbox"/> | <input type="checkbox"/> | <input type="checkbox"/> |
| 50. Feeling everything is a effort                   | <input type="checkbox"/> | <input type="checkbox"/> | <input type="checkbox"/> | <input type="checkbox"/> |
| 51. Feeling hopeless about the future                | <input type="checkbox"/> | <input type="checkbox"/> | <input type="checkbox"/> | <input type="checkbox"/> |

SUPPLEMENTARY FILE 2

Flowchart of the study participants

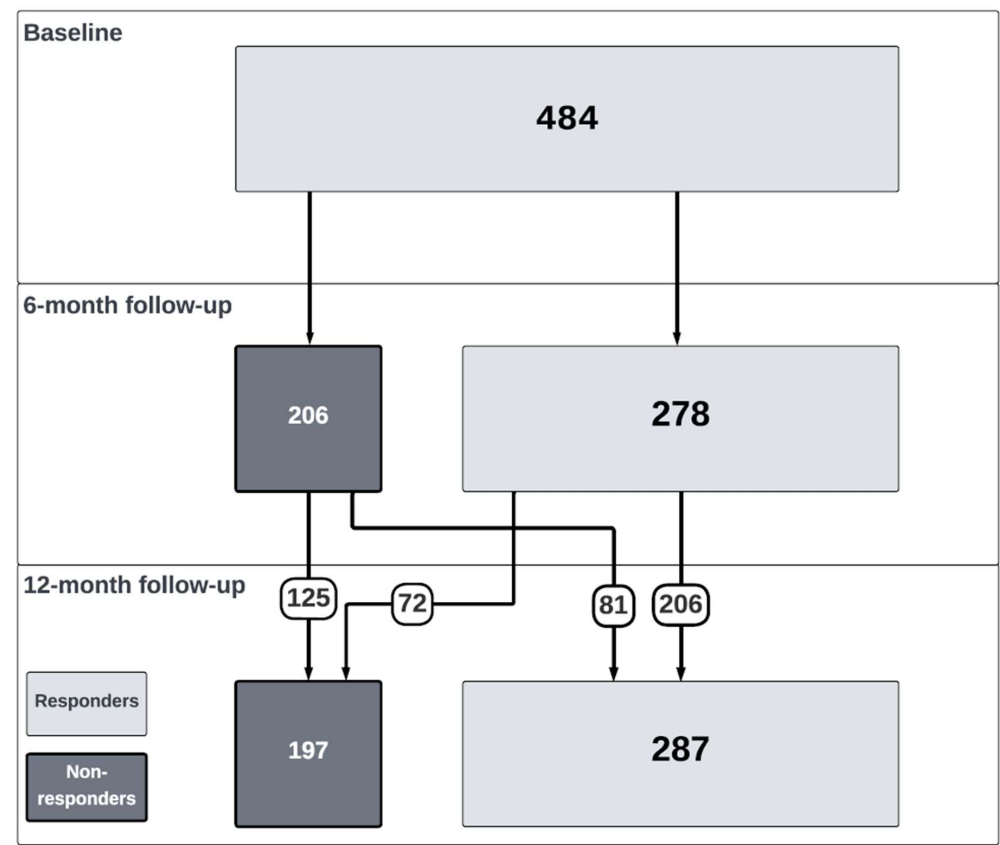



SUPPLEMENTARY FILE 3

| Table 1 Symptoms of anxiety and depression by HSCL-10 at baseline, 6-month and 12-month follow-up, N=206. |                        |              |                        |              |                        |              |
|-----------------------------------------------------------------------------------------------------------|------------------------|--------------|------------------------|--------------|------------------------|--------------|
|                                                                                                           | Baseline               |              | 6-month                |              | 12-month               |              |
|                                                                                                           | Median (IQR, min- max) | n ≥ 1.85 (%) | Median (IQR, min- max) | n ≥ 1.85 (%) | Median (IQR, min- max) | n ≥ 1.85 (%) |
| Total population                                                                                          | 1.25 (0.5, 1.0-3.6)    | 23 (11.2)    | 1.10 (0.5, 1.0-3.9)    | 19 (9.2)     | 1.20 (0.5, 1.0-3.9)    | 26 (12.6)    |
| Nurses (n=164)                                                                                            | 1.30 (0.58, 1.0-3.6)   | 19 (11.2)    | 1.20 (0.5, 1.0-3.9)    | 17 (10.4)    | 1.30 (0.6, 1.0-3.9)    | 24 (14.6)    |
| Physicians (n=21)                                                                                         | 1.30 (0.45, 1.0-2.4)   | 2 (9.5)      | 1.10 (0.4, 1.0-2.3)    | 1 (4.8)      | 1.00 (0.4, 1.0-2.3)    | 1 (4.8)      |
| Leaders (n=21)                                                                                            | 1.20 (0.55, 1.0-2.2)   | 2 (9.5)      | 1.00 (0.6, 1.0, 2.3)   | 1 (4.8)      | 1.1 (0.45, 1.0-2.1)    | 1 (4.8)      |
| Difference between professions <sup>a</sup>                                                               | 0.798                  |              | 0.365                  |              | 0.032*                 |              |

Notes: HSCL-10 scale 1.0-4.0, cut off ≥1.85. <sup>a</sup> Kruskal-Wallis test \*p≤0.05

Wilcoxon signed rank test

Baseline to 6-month 0.025\*

6-month to 12-month 0.022\*

Baseline to 12-month 0.926

**Table 2** Symptoms of PTSD by PCL-5 at baseline, 6-month and 12-month follow-up, N=206.

|                                             | Baseline               |           | 6-month                |           | 12-month               |           |
|---------------------------------------------|------------------------|-----------|------------------------|-----------|------------------------|-----------|
|                                             | Median (IQR, min- max) | n ≥31 (%) | Median (IQR, min- max) | n ≥31 (%) | Median (IQR, min- max) | n ≥31 (%) |
| Total population                            | 7 (14, 0-64)           | 14 (6.8)  | 5.5 (14, 0-68)         | 11 (5.3)  | 6.5 (15, 0-71)         | 11 (5.3)  |
| Nurses (n=164)                              | 7 (13, 0-64)           | 12 (7.3)  | 6.5 (14, 0-68)         | 10 (6.1)  | 10 (15,0-71)           | 11 (6.7)  |
| Physicians (n=21)                           | 4 (6, 0-27)            | 0         | 2 (7, 0-15)            | 0         | 4 (7, 0-22)            | 0         |
| Leaders (n=21)                              | 6 (15, 0-35)           | 2 (9.5)   | 4 (16, 0-40)           | 1 (4.8)   | 3 (9, 0-23)            | 0         |
| Difference between professions <sup>a</sup> | 0.038*                 |           | 0.097                  |           | 0.002*                 |           |

Notes: PCL-5 scale 0 -80, cut off: 31. <sup>a</sup> Kruskal-Wallis test \*p≤0.05

Wilcoxon signed rank test

Baseline to 6-month 0.503

6-month to 12-month 0.004\*

Baseline to 12-month 0.108

## SUPPELMENATARY FILE 4

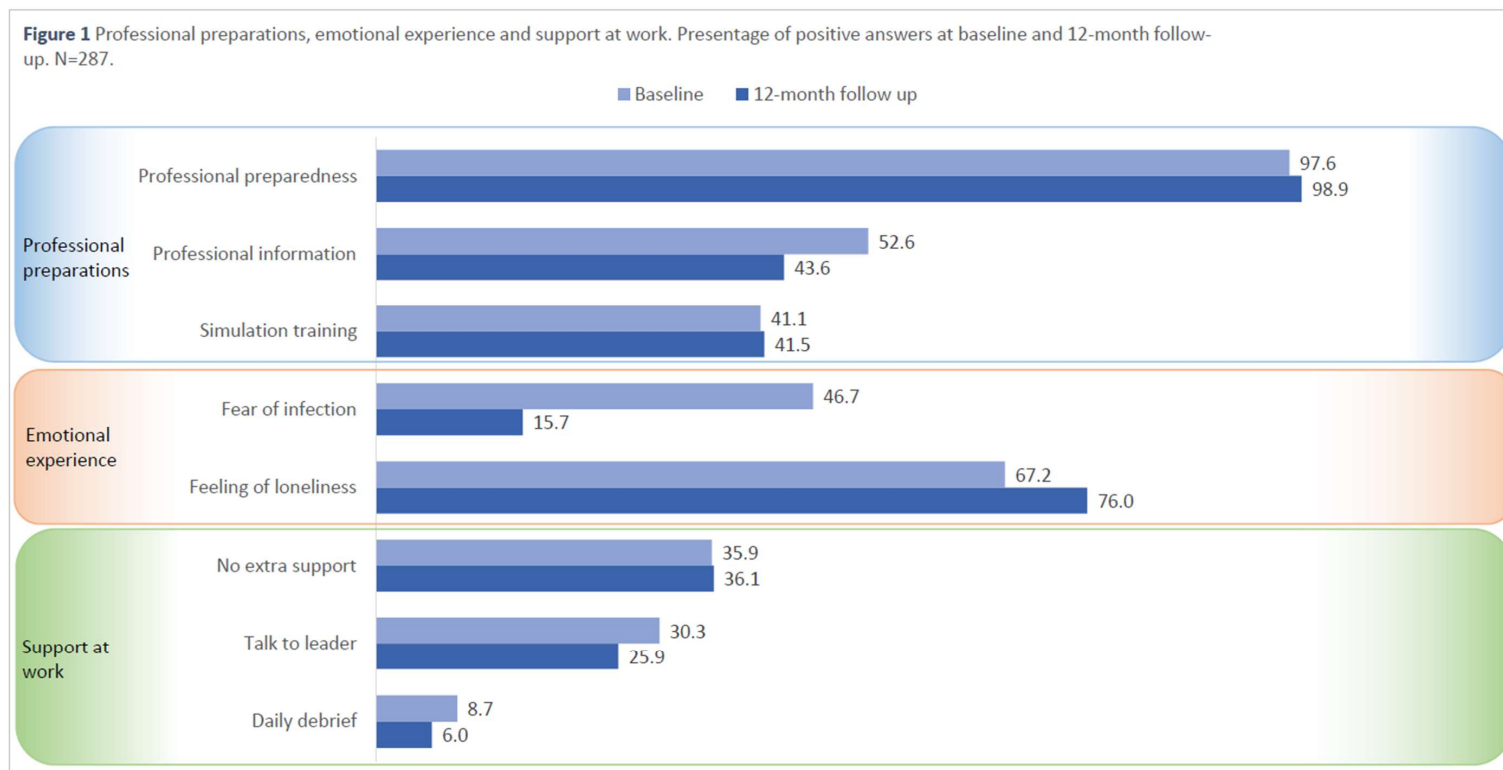

## SUPPLEMENTARY FILE 5

| Table 1 Demographic variables and preparations, emotional experience and support at baseline and their effect on HSCL-10 at 12 month follow up. Multiple regression analysis. 20 imputed datasets of n=484 |                           |       |             |             |         |
|------------------------------------------------------------------------------------------------------------------------------------------------------------------------------------------------------------|---------------------------|-------|-------------|-------------|---------|
| Demographic variables                                                                                                                                                                                      |                           |       | Coefficient | 95% CI      | P-value |
| Gender                                                                                                                                                                                                     | Female                    |       | Ref         |             |         |
|                                                                                                                                                                                                            | Male                      |       | -0.06       | -0.2, 0.08  | 0.398   |
| Marital status                                                                                                                                                                                             | Single                    |       | Ref         |             |         |
|                                                                                                                                                                                                            | Married/partner           |       | -0.04       | -0.2, 0.09  | 0.569   |
| Years of professional experience                                                                                                                                                                           |                           |       | -0.003      | -0.01, 0.01 | 0.351   |
| Profession                                                                                                                                                                                                 | Nurse                     |       | Ref         |             |         |
|                                                                                                                                                                                                            | Physician                 |       | -0.07       | -0.3, 0.1   | 0.509   |
|                                                                                                                                                                                                            | Leader                    |       | 0.02        | -0.2, 0.2   | 0.839   |
| Previous ICU experience                                                                                                                                                                                    | No                        |       | Ref         |             |         |
|                                                                                                                                                                                                            | Yes                       |       | 0.1         | -0.1, 0.3   | 0.343   |
| Self-reported previous symptoms of anxiety                                                                                                                                                                 | No                        |       | Ref         |             |         |
|                                                                                                                                                                                                            | Yes                       |       | 0.1         | -0.2, 0.3   | 0.477   |
| Self-reported previous symptoms of depression                                                                                                                                                              | No                        |       | Ref         |             |         |
|                                                                                                                                                                                                            | Yes                       |       | 0.2         | 0.001, 0.4  | 0.047   |
| Risk factors for serious COVID-infection                                                                                                                                                                   | No                        |       | Ref         |             |         |
|                                                                                                                                                                                                            | Yes                       |       | -0.02       | -0.2, 0.2   | 0.811   |
| Professional preparations                                                                                                                                                                                  | Professional preparedness | No    | Ref         |             |         |
|                                                                                                                                                                                                            |                           | Yes   | 0.002       | -0.4, 0.4   | 0.990   |
|                                                                                                                                                                                                            | Professional information  | No    | Ref         |             |         |
|                                                                                                                                                                                                            |                           | Yes   | 0.06        | -0.09, 0.2  | 0.433   |
|                                                                                                                                                                                                            | Simulation training       | No    | Ref         |             |         |
|                                                                                                                                                                                                            | Yes                       | 0.007 | -0.1, 0.1   | 0.915       |         |
| Emotional experience                                                                                                                                                                                       | Fear of infection         | No    | Ref         |             |         |
|                                                                                                                                                                                                            |                           | Yes   | 0.14        | 0.02, 0.3   | 0.023   |
|                                                                                                                                                                                                            | Feeling of loneliness     | No    | Ref         |             |         |
|                                                                                                                                                                                                            |                           | Yes   | 0.09        | -0.05, 0.2  | 0.226   |
| Support at work                                                                                                                                                                                            | No extra support          | No    | Ref         |             |         |
|                                                                                                                                                                                                            |                           | Yes   | -0.03       | -0.2, 0.1   | 0.621   |
|                                                                                                                                                                                                            | Talk to leader            | No    | Ref         |             |         |
|                                                                                                                                                                                                            |                           | Yes   | -0.05       | -0.2, 0.1   | 0.517   |
|                                                                                                                                                                                                            | Daily debrief             | No    | Ref         |             |         |
|                                                                                                                                                                                                            |                           | Yes   | -0.08       | -0.3, 0.1   | 0.455   |

**Table 2** Demographic variables and preparations, emotional experience and support at baseline and their effect on PCL-5 at 12 month follow up. Multiple regression analysis. 20 imputed datasets n=484

| Demographic variables                         |                           |     | Coefficient | 95% CI     | P-value |
|-----------------------------------------------|---------------------------|-----|-------------|------------|---------|
| Gender                                        | Female                    |     | Ref         |            |         |
|                                               | Male                      |     | -0.3        | -3.9, 3.4  | 0.891   |
| Marital status                                | Married/partner           |     | Ref         |            |         |
|                                               | Single                    |     | 0.5         | -3.4, 4.3  | 0.809   |
| Years of professional experience              |                           |     | -0.04       | -0.2, 0.1  | 0.640   |
| Profession                                    | Nurse                     |     | Ref         |            |         |
|                                               | Physician                 |     | -4.2        | -9.3, 0.8  | 0.099   |
|                                               | Leader                    |     | -2.0        | -6.6, 2.5  | 0.377   |
| Previous ICU experience                       | No                        |     | Ref         |            |         |
|                                               | Yes                       |     | 4.2         | -1.7, 10.1 | 0.159   |
| Self-reported previous symptoms of anxiety    | No                        |     | Ref         |            |         |
|                                               | Yes                       |     | 0.7         | -4.2 5.7   | 0.782   |
| Self-reported previous symptoms of depression | No                        |     | Ref         |            |         |
|                                               | Yes                       |     | 5.6         | 1.0, 10.2  | 0.017   |
| Risk factors for serious COVID-infection      | No                        |     | Ref         |            |         |
|                                               | Yes                       |     | 0.6         | -3.8, 4.9  | 0.801   |
| Professional preparations                     | Professional preparedness | No  | Ref         |            |         |
|                                               |                           | Yes | -4.2        | -16.3, 8.0 | 0.491   |
|                                               | Professional information  | No  | Ref         |            |         |
|                                               |                           | Yes | 0.5         | -3.3, 4.3  | 0.787   |
|                                               | Simulation training       | No  | Ref         |            |         |
|                                               |                           | Yes | 1.4         | -1.5, 4.3  | 0.330   |
| Emotional experience                          | Fear of infection         | No  | Ref         |            |         |
|                                               |                           | Yes | 4.3         | 0.8, 7.8   | 0.017   |
|                                               | Feeling of loneliness     | No  | Ref         |            |         |
|                                               |                           | Yes | 4.7         | 1.1, 8.3   | 0.011   |
| Support at work                               | No extra support          | No  | Ref         |            |         |
|                                               |                           | Yes | -0.4        | -3.8, 3.0  | 0.815   |
|                                               | Talk to leader            | No  | Ref         |            |         |
|                                               |                           | Yes | -0.9        | -4.6, 2.7  | 0.611   |
|                                               | Daily debrief             | No  | Ref         |            |         |
|                                               |                           | Yes | -2.7        | -7.5, 2.2  | 0.289   |
